# Supplementary material for: Theoretical studies on di- and tetra-nuclear Ni pivalate complexes
Source: Royal Society of Chemistry journal article supplement (doi:10.1039/b502115d), 2005-01-01
Supplement: b502115d.pdf [file b502115d.pdf]

**Electronic supplementary information:  
 Theoretical Studies on Di- and Tetra-nuclear Ni Pivalate Complexes**

Gopalan Rajaraman,\* Kirsten E. Christensen, Finn K. Larsen, Grigore A. Timco and R. E. P. Winpenny \*

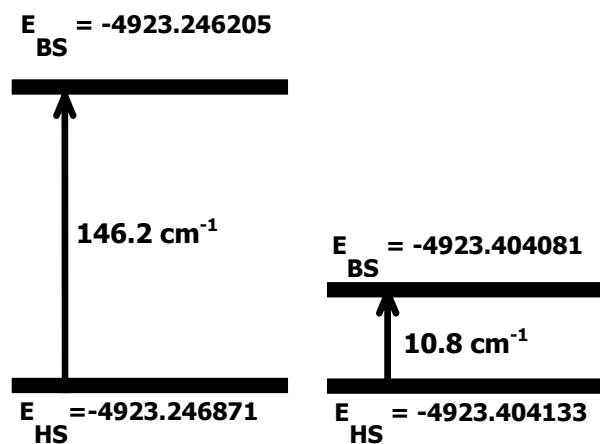

ESI-Figure 1. The absolute energies of the high spin and broken symmetry state (in Hartree) of 1A and 1B and the energy difference between the states (in  $\text{cm}^{-1}$ ) are shown in ESI-Figure 1. The chosen spin configurations and their relative energy to calculate the  $J$ -values for 2 is given ESI-Figure 2.

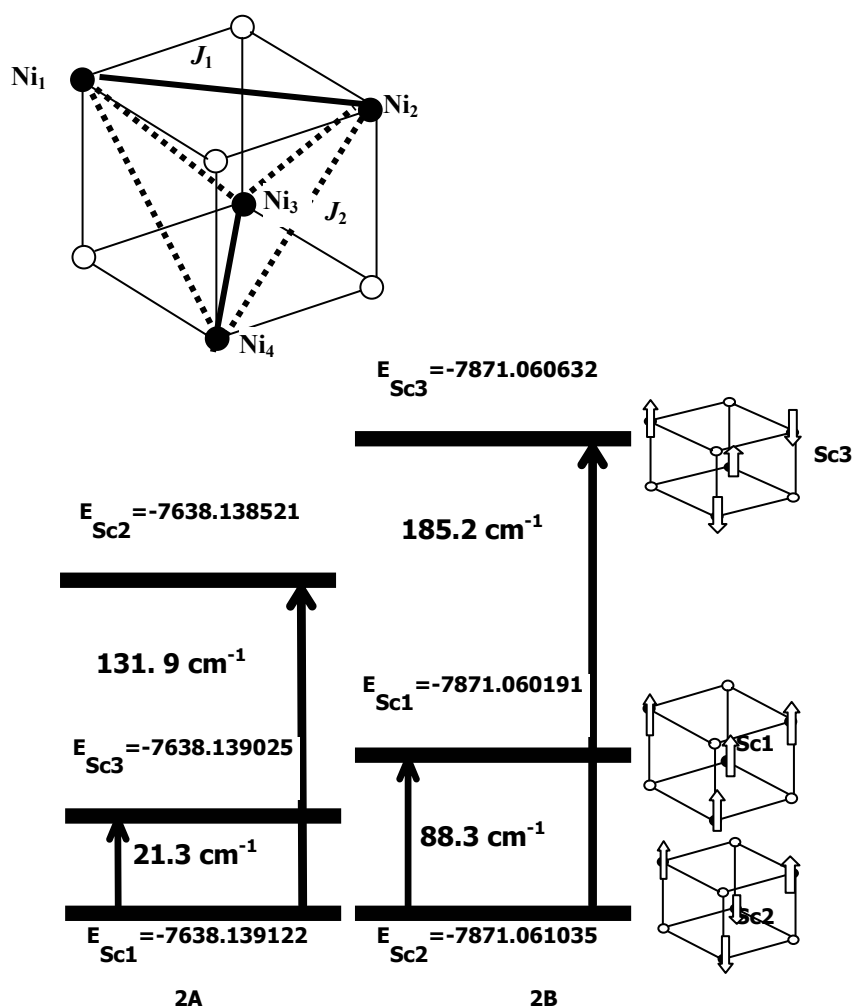

ESI-Figure 2. The two exchange interaction  $J_1$  and  $J_2$  in 2. The absolute energies of the chosen spin configuration (in Hartree) and the relative energies (in  $\text{cm}^{-1}$ ) of the spin configurations of 2A and 2B.

The equations used to calculate the  $J$ -values is given in as follows,

$$\frac{(E_{S_{c_1}} - E_{S_{c_2}})}{2S_1S_2 + S_2} = -2J_1 - 2J_2$$

$$\frac{(E_{S_{c_1}} - E_{S_{c_3}})}{2S_1S_2 + S_2} = -4J_2$$

Where  $S_1$  and  $S_2$  are the spin on the metal centre.

The XYZ coordinates of the optimised structure of 2B is as follows,

|    |          |          |          |
|----|----------|----------|----------|
| Ni | 10.28200 | 1.57300  | 6.70700  |
| Ni | 10.47700 | 1.50600  | 3.80700  |
| Ni | 8.09100  | 2.95500  | 5.24000  |
| Ni | 8.01800  | 0.17000  | 5.07300  |
| O  | 10.07500 | 2.93100  | 5.21500  |
| C  | 10.88500 | 4.13400  | 5.20400  |
| H  | 11.71300 | 4.01400  | 4.48400  |
| H  | 11.29300 | 4.32700  | 6.21300  |
| H  | 10.27200 | 5.00300  | 4.89500  |
| O  | 10.01500 | 0.09000  | 5.25300  |
| C  | 10.78900 | -1.13100 | 5.21700  |
| H  | 10.30100 | -1.88100 | 4.56200  |
| H  | 10.90500 | -1.55400 | 6.23700  |
| H  | 11.79400 | -0.93200 | 4.80500  |
| O  | 8.21700  | 1.46100  | 6.57100  |
| C  | 7.35400  | 1.34700  | 7.71700  |
| H  | 7.46300  | 2.23500  | 8.36300  |
| H  | 7.63300  | 0.45600  | 8.30900  |
| H  | 6.29600  | 1.26200  | 7.41000  |
| O  | 8.39100  | 1.61900  | 3.73200  |
| C  | 7.75800  | 1.70700  | 2.43400  |
| H  | 6.66200  | 1.82200  | 2.52500  |
| H  | 7.97900  | 0.79500  | 1.84800  |
| H  | 8.17200  | 2.57300  | 1.88500  |
| O  | 8.17300  | 4.32600  | 6.72100  |
| H  | 8.88100  | 4.03000  | 7.39000  |
| C  | 7.14100  | 5.17900  | 7.27200  |
| H  | 7.56200  | 6.16100  | 7.55500  |
| H  | 6.66300  | 4.71400  | 8.15600  |
| H  | 6.37700  | 5.31700  | 6.49100  |
| O  | 7.76700  | -1.54100 | 6.12300  |
| H  | 8.53800  | -1.82700 | 6.65800  |
| C  | 6.51800  | -2.22400 | 6.45900  |
| H  | 6.28100  | -2.09100 | 7.53000  |
| H  | 6.59400  | -3.29900 | 6.21400  |
| H  | 5.74500  | -1.74100 | 5.84500  |
| O  | 10.00900 | 3.10400  | 8.22400  |
| O  | 10.31500 | 0.96400  | 8.77500  |
| C  | 10.16100 | 2.18500  | 9.14700  |
| C  | 10.23400 | 2.56800  | 10.59900 |
| O  | 12.26500 | 1.61300  | 6.59300  |
| O  | 12.44500 | 1.45200  | 4.32100  |
| C  | 12.95500 | 1.54500  | 5.49900  |
| C  | 14.46200 | 1.60600  | 5.62700  |
| O  | 10.86300 | 2.57300  | 2.02000  |
| O  | 10.76000 | 0.34800  | 2.07100  |
| C  | 10.98800 | 1.43900  | 1.40400  |
| C  | 11.43500 | 1.38100  | -0.03100 |
| O  | 6.09900  | 2.75600  | 5.08100  |
| O  | 6.04300  | 0.47600  | 4.86900  |
| C  | 5.47400  | 1.64300  | 4.88500  |
| C  | 3.98100  | 1.69100  | 4.65800  |
| H  | 14.76800 | 2.64900  | 5.83800  |
| H  | 14.79800 | 0.98800  | 6.47800  |
| H  | 14.94300 | 1.27700  | 4.69300  |
| H  | 9.78500  | 3.56000  | 10.76900 |
| H  | 9.73800  | 1.80500  | 11.22300 |
| H  | 11.29600 | 2.61000  | 10.91000 |
| H  | 11.27400 | 2.35200  | -0.52700 |
| H  | 12.51600 | 1.14300  | -0.06900 |
| H  | 10.90100 | 0.57800  | -0.56800 |
| H  | 3.61600  | 2.72900  | 4.68000  |
| H  | 3.73700  | 1.22900  | 3.68300  |
| H  | 3.46200  | 1.09600  | 5.43400  |
